# Supplementary material for: Wet-spinning of magneto-responsive helical chitosan microfibers
Source: PubMed Central journal article supplement (PMC7356321; doi:10.3762/bjnano.11.83), 2020-07-07
Supplement: Beilstein_J_Nanotechnol-11-991-s001.pdf [file Beilstein_J_Nanotechnol-11-991-s001.pdf]

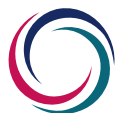

## Supporting Information

for

### **Wet-spinning of magneto-responsive helical chitosan microfibers**

Dorothea Brüggemann, Johanna Michel, Naiana Suter, Matheus Grande de Aguiar and Michael Maas

*Beilstein J. Nanotechnol.* **2020**, *11*, 991–999. [doi:10.3762/bjnano.11.83](https://doi.org/10.3762/bjnano.11.83)

### **Additional experimental data**

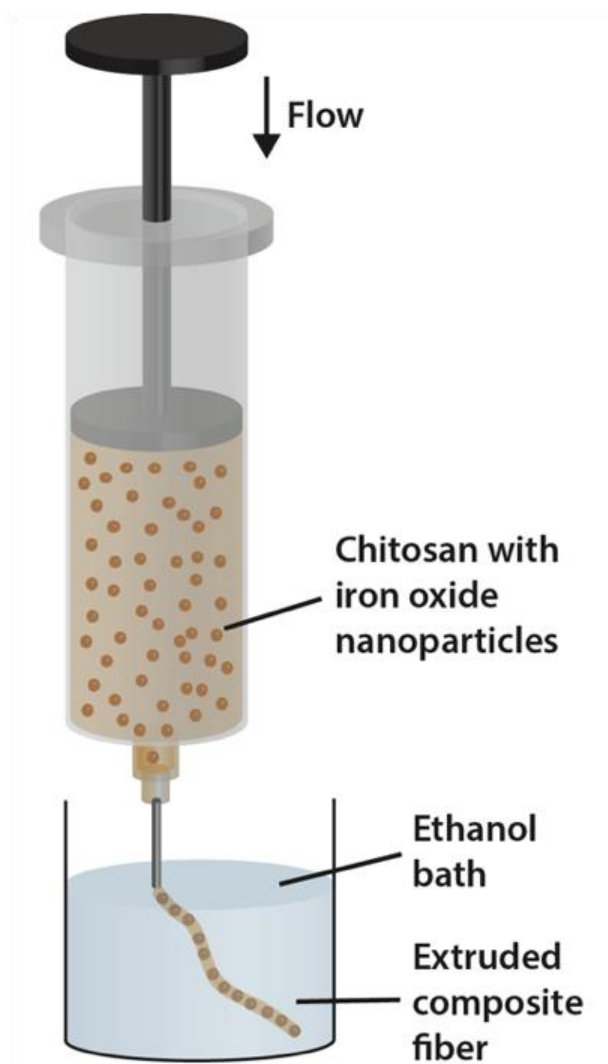

**Figure S1:** Schematic of the custom-built setup for wet-spinning of chitosan solutions blended with IOPs. Viscous feedstock solutions were extruded into an ethanol coagulation bath to facilitate fiber preparation.

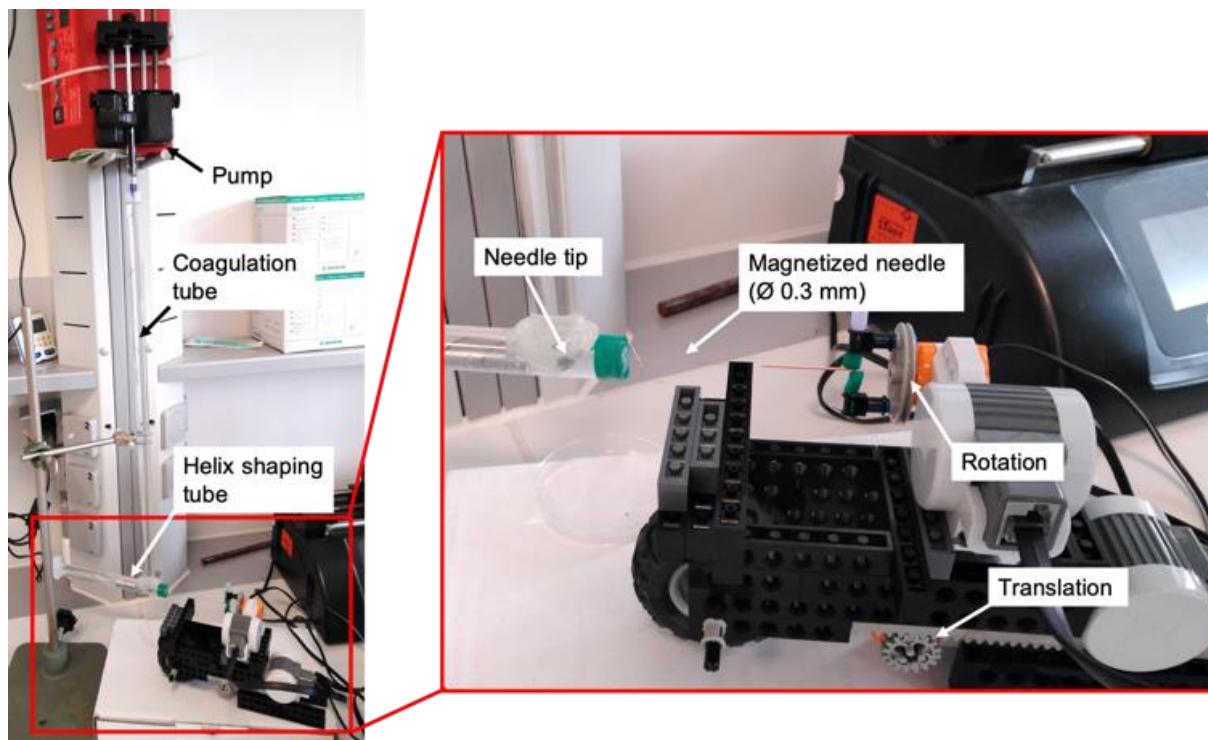

**Figure S2:** Custom-built setup for the wet-spinning process of helical microfibers. A solution of chitosan containing magnetic iron oxide nanoparticles is extruded into an ethanol coagulation bath. The emerging fibers are collected by a teflon-coated rotating needle with a stainless steel core, which simultaneously performs a translatory movement to achieve a helical fiber shape.

**Table S1:** Magnetic properties of the samples as determined with VSM.

| VSM results                         | iron oxide concentration |                       |                       |                        |
|-------------------------------------|--------------------------|-----------------------|-----------------------|------------------------|
|                                     | 1 mg·mL <sup>-1</sup>    | 4 mg·mL <sup>-1</sup> | 7 mg·mL <sup>-1</sup> | 10 mg·mL <sup>-1</sup> |
| saturation magnetization [T]        | 0.012                    | 0.041                 | 0.041                 | 0.052                  |
| remanent magnetization [T]          | $2.99 \times 10^{-4}$    | $7.69 \times 10^{-6}$ | $7.69 \times 10^{-6}$ | $4.80 \times 10^{-3}$  |
| coercive field [A·m <sup>-1</sup> ] | -150                     | -231                  | -231                  | -211                   |
| $BH_{max}$ [MGsOe]                  | $4.65 \times 10^{-5}$    | $3.16 \times 10^{-4}$ | $3.16 \times 10^{-4}$ | $3.15 \times 10^{-4}$  |

**Table S2:** Dynamic light scattering analysis of IOP dispersions in water.

| pH   | ZP [mV] | pH   | Z-ave [nm] | number mean [nm] |
|------|---------|------|------------|------------------|
| 10.9 | -50.1   | 10.9 | 888        | 128              |
| 6.32 | -26.4   | 6.4  | 684        | 103              |
| 6.52 | -27.8   | 6.6  | 445        | 115              |
| 3.14 | 29.9    | 3.2  | 380        | 95               |
